# Supplementary material
Source: PubMed Central journal article supplement (PMC6643229)
Supplement: AEM.00443-19-s0001.pdf [file AEM.00443-19-s0001.pdf]

Supplementary Information

Hydrocarbon-degrading microbial communities are site-specific  
and their activity is limited by synergies in temperature and  
nutrient availability in surface ocean waters

Xiaoxu Sun<sup>1,3</sup> and Joel E Kostka<sup>1,2,\*</sup>

<sup>1</sup> School of Earth and Atmospheric Sciences, Georgia Institute of Technology, Atlanta, GA  
30332 United States

<sup>2</sup> School of Biological Sciences, Georgia Institute of Technology, Atlanta, GA 30332  
United States

<sup>3</sup> Guangdong Key Laboratory of Agricultural Environment Pollution Integrated Control,  
Guangdong Institute of Eco-Environmental and Soil Sciences, Guangzhou, 510650 China

Running Title: Hydrocarbon biodegradation in surface ocean waters

\*Corresponding Author:

Room 225, Cherry Emerson Bldg.

310 Ferst Drive

Atlanta, Georgia 30332-0230

Phone: 404-385-3325

Fax: 404-894-0519

Email address: [joel.kostka@biology.gatech.edu](mailto:joel.kostka@biology.gatech.edu)

3 Pages

2 Figures

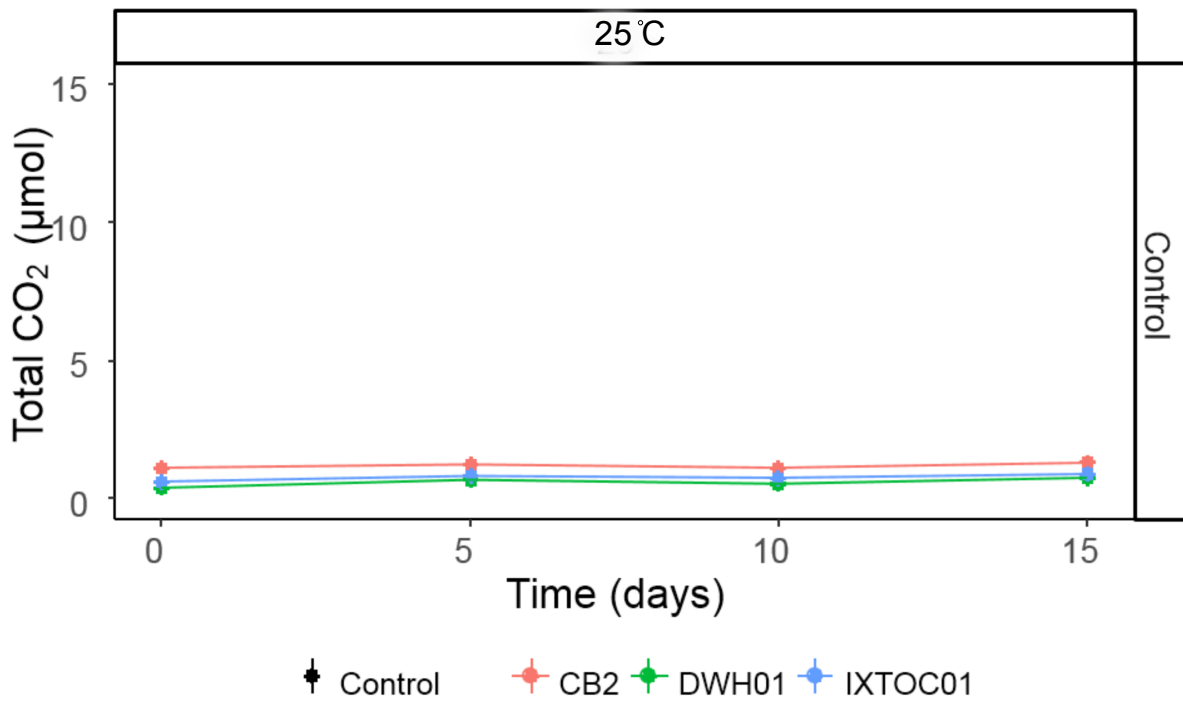

Supplementary S1. Respiration as determined by CO<sub>2</sub> accumulation in control microcosms to which no oil was added. Values are the averages from triplicate microcosms. Error bars are standard deviations.

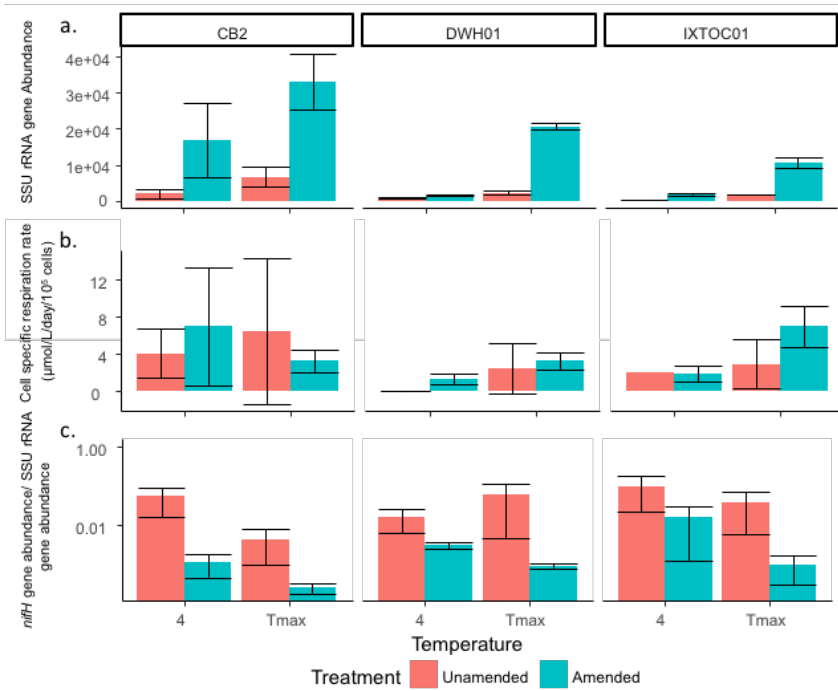

Figure S2. SSU rRNA gene abundance and cell specific respiration rates at 4 °C and T<sub>opt</sub> (30 °C for CB2 and 38 °C for DWH01 and IXTOC01). Barplots show mean value from triplicate measurements for each of the triplicate samples. Error bars are standard deviation
